# Supplementary material
Source: Royal Society of Chemistry journal article supplement (doi:10.1039/d5cp04621a)
Supplement: d5cp04621a1.pdf [file d5cp04621a1.pdf]

Supporting Information:  
Exploring the Conformation Dependent  
Reactivity and Dynamics of a Dinucleotide  
Inhibitor of Ribonuclease A

Sudipti Priyadarsinee,<sup>a</sup> Arunendu Das,<sup>a,\*</sup> and Srabani Taraphder<sup>a,\*</sup>

<sup>(a)</sup> *Department of Chemistry, Indian Institute of Technology Kharagpur, Kharagpur*  
*721302, India*

E-mail: [srabani@chem.iitkgp.ac.in](mailto:srabani@chem.iitkgp.ac.in)

## Supplementary Information

Definition of *closed* and *open* of the inhibitor from the distance between N (-NH<sub>2</sub>) of adenine base and =O of uracil ( $d_{ee}$ ):

$$\textit{Closed} - d_{ee} \leq 10 \text{ \AA}$$

$$\textit{Open} - d_{ee} > 10 \text{ \AA}$$

Table S1: Total ground-state energies (Hartree) of the optimized structure of the *open* conformer at the B3LYP/def2-TZVP level with two different dispersion correction methods.

|                        | <b>[B3LYP/def2-TZVP<br/>IOP(3/124=40)]</b> | <b>[B3LYP/def2-TZVP<br/>IOP(3/124=30)]</b> |
|------------------------|--------------------------------------------|--------------------------------------------|
| Total Energy (Hartree) | -3995.3971                                 | -3995.3117                                 |

Table S2: Ground state energies of the optimized structures of *closed* and *open* conformers at different levels of theory.

| <b>PUA</b>    | <b>B3LYP/def2-TZVP</b> | <b>B3LYP/6-31G++(d,p)</b> | <b>HF/6-31G</b> |
|---------------|------------------------|---------------------------|-----------------|
| <i>Closed</i> | -3995.2162             | -3994.024                 | -3975.2169      |
| <i>Open</i>   | -3995.1958             | -3994.021                 | -3975.2113      |

Table S3: Comparison of total energies (Hartree) and global reactivity descriptors (eV) for *closed* conformer with ribose and arabinose units optimized at the B3LYP/def2-TZVP level.

|                         | <i>Closed (ribose)</i> | <i>Closed (arabinose)</i> |
|-------------------------|------------------------|---------------------------|
| Energy (Hartree)        | -3995.2148             | -3995.2162                |
| <b>Descriptors (eV)</b> |                        |                           |
| Electronegativity       | 3.72                   | 3.88                      |
| Chemical Potential      | -3.72                  | -3.88                     |
| Global Hardness         | 2.46                   | 2.49                      |
| Global Softness         | 0.20                   | 0.20                      |
| Electrophilicity Index  | 2.81                   | 3.03                      |
| Softness                | 0.40                   | 0.40                      |

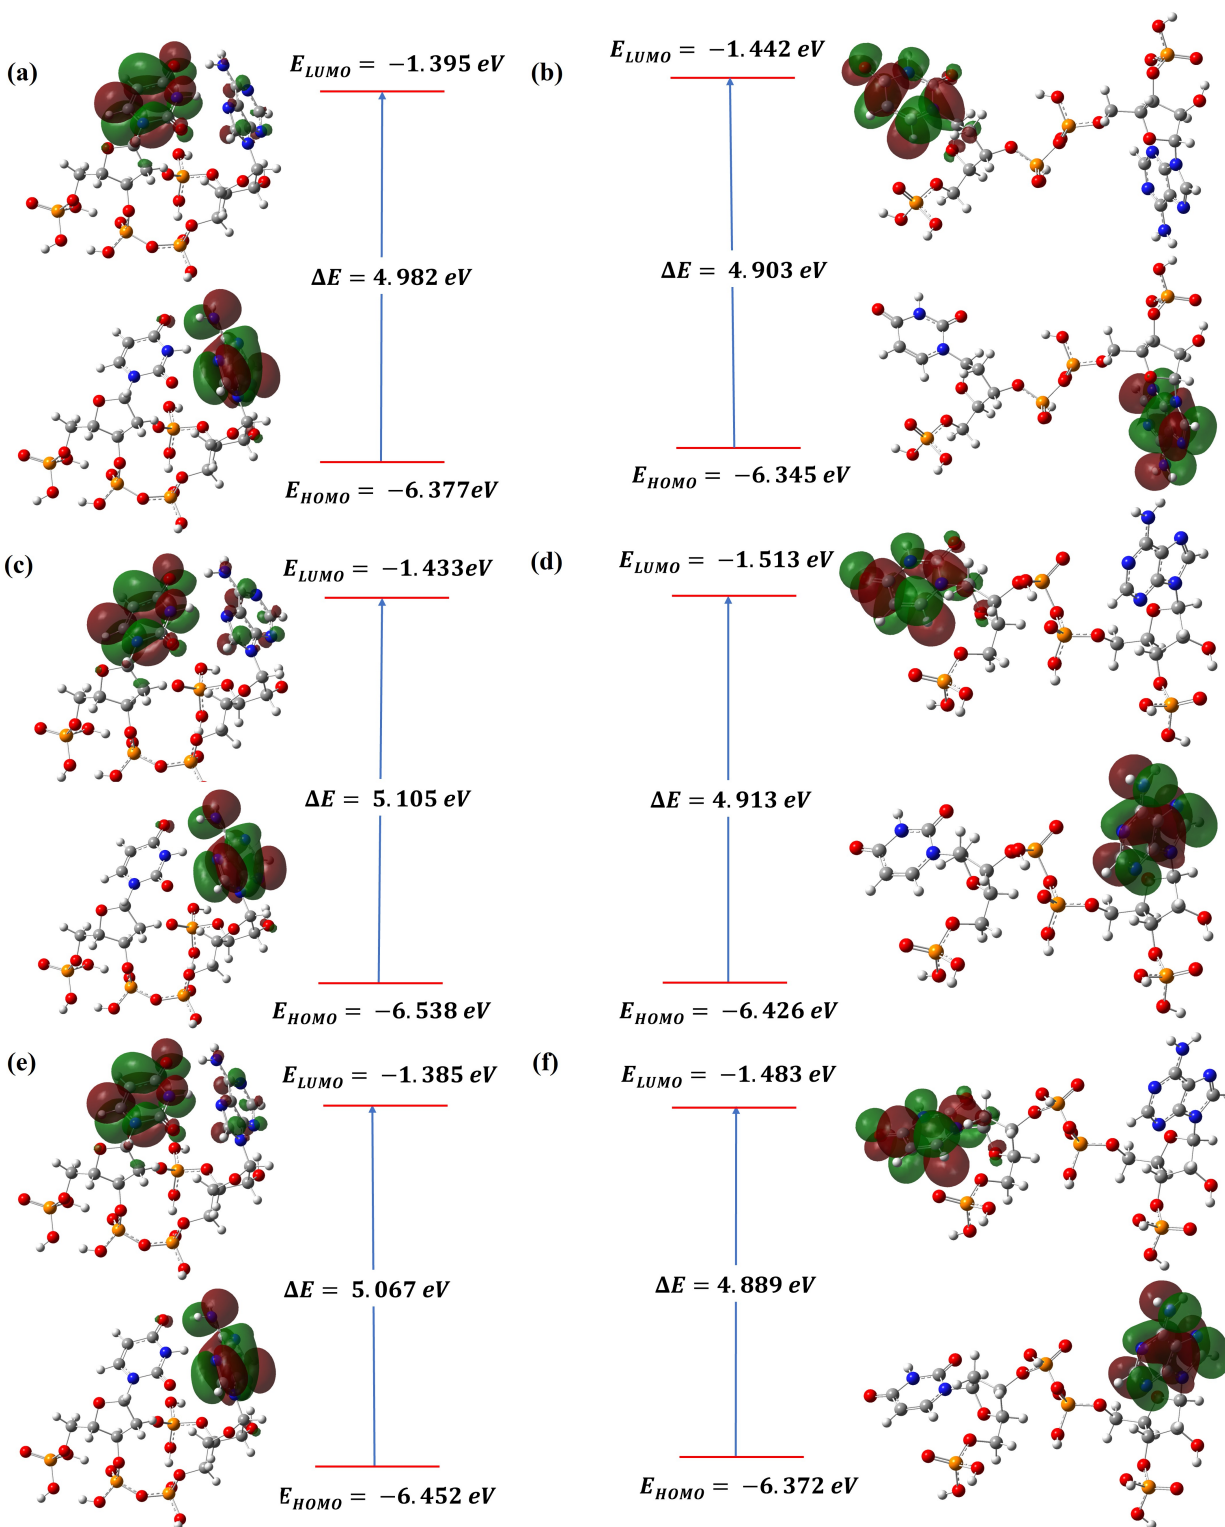

Figure S1: HOMO-LUMO gap for the (a,c,e) *closed* and (b,d,f) *open* conformers of PUA in (a,b) the gas phase (c,d) in water and (e,f) diethyl ether without dispersion correction terms in the calculation of total energy,  $E$ . Also shown the HOMO and LUMO orbitals; green and red lobes represent the negative and positive electron densities, respectively.

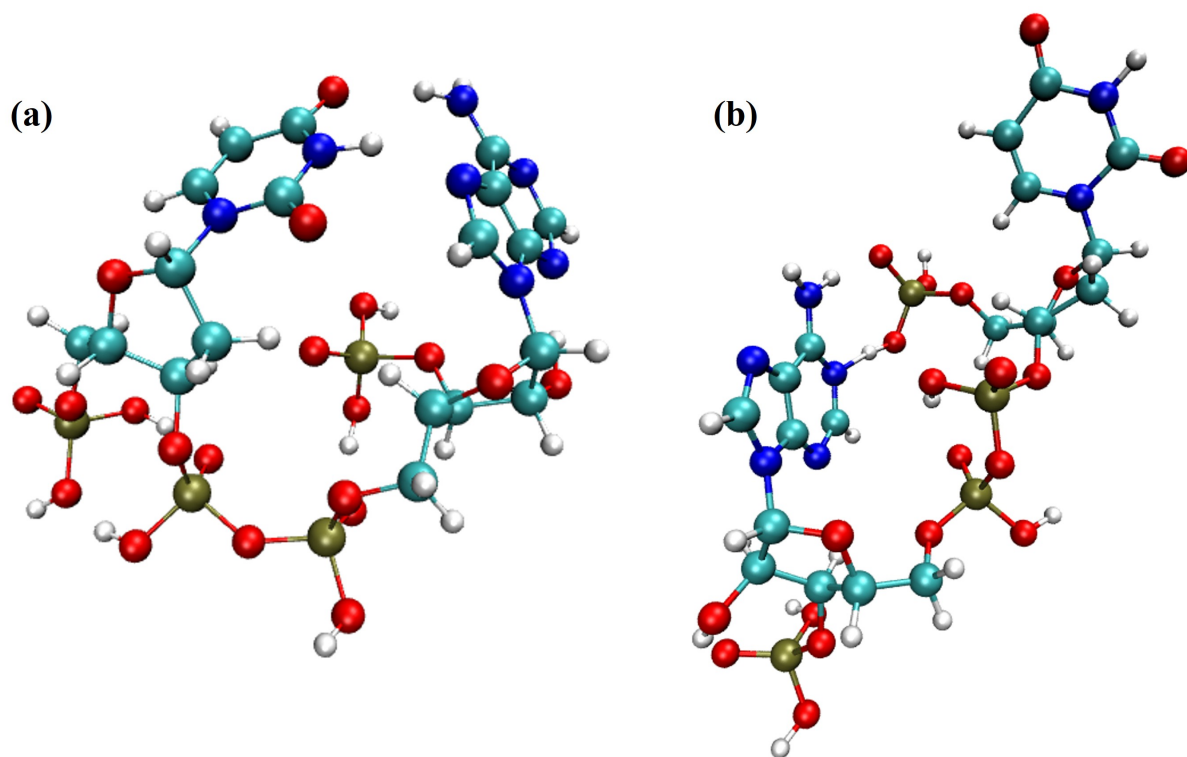

Figure S2: Optimized geometries of (a) *closed* and (b) *open* PUA are presented using the B3LYP/6-31G++(d,p) level.

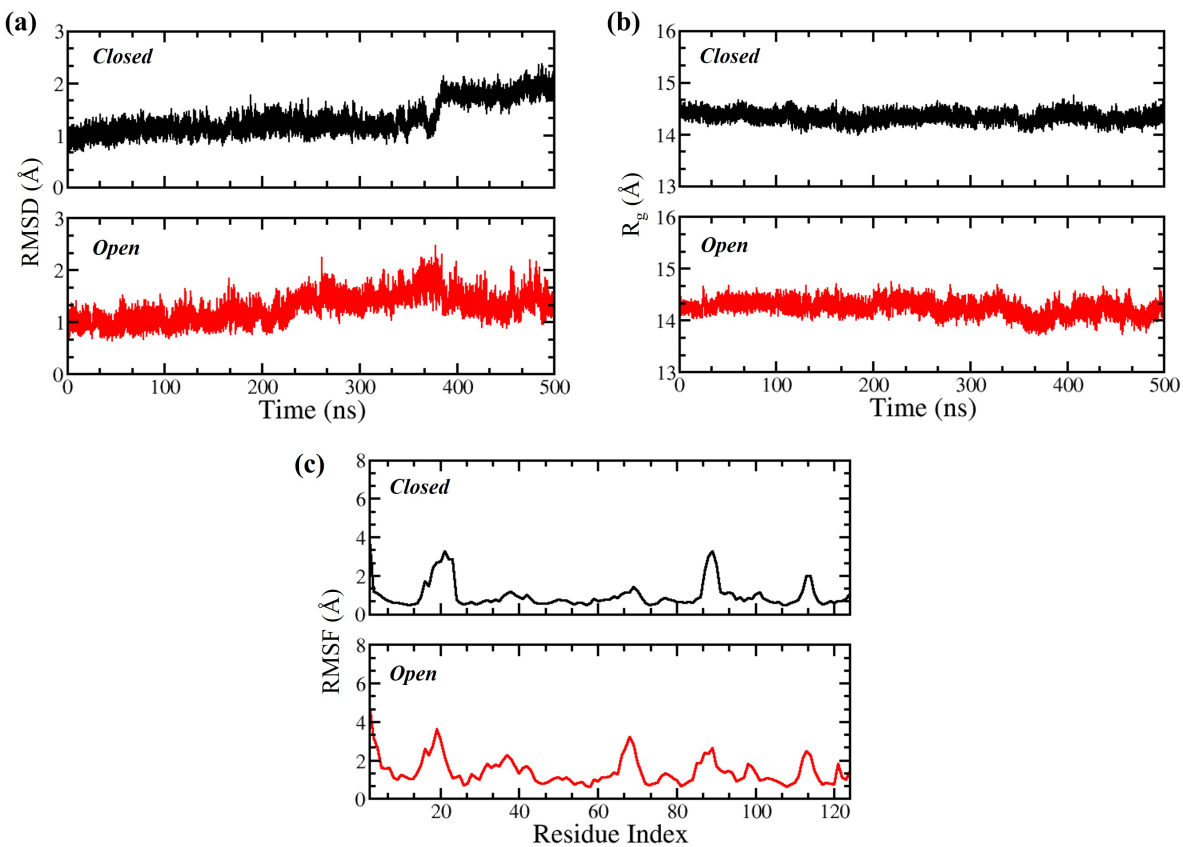

Figure S3: (a) Root mean square deviation (RMSD), radius of gyration ( $R_g$ ) and root mean square fluctuations (RMSF) of backbone atoms (N,  $C_\alpha$ , C) calculated for the 500 ns MD trajectories for both *closed* and *open* inhibitor-bound RNases.

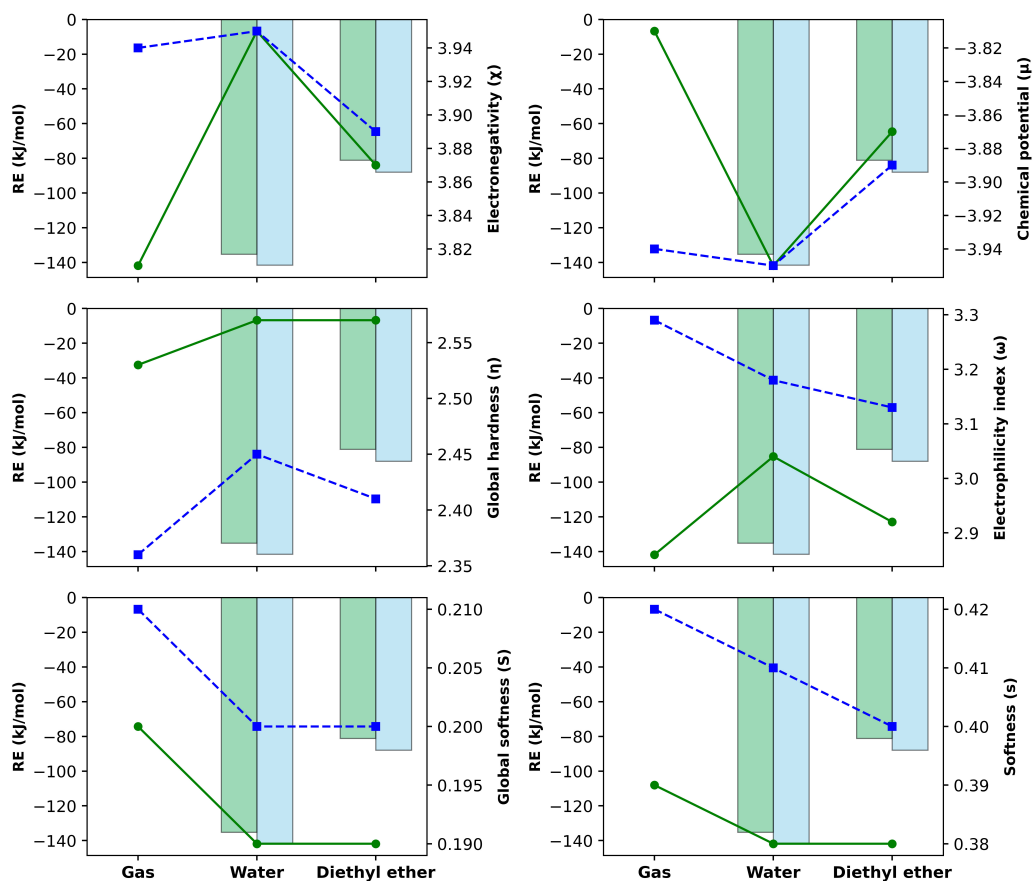

Figure S4: Comparison between the changes in the relative energy (kJ/mol) of the inhibitor and electronic descriptors including (a) electronegativity ( $\chi$ ), (b) chemical potential ( $\mu$ ), (c) global hardness ( $\eta$ ), (d) electrophilicity index ( $\omega$ ), (e) global softness ( $S$ ) and (f) softness ( $s$ ) (in eV) values in the gas and solvent phase considered, respectively, for the *closed* (shown in green) and *open* conformer (shown in blue).

## Initial coordinates $(x, y, z)$ of the *closed* conformation

|   |             |             |             |
|---|-------------|-------------|-------------|
| C | 0.25642003  | 7.85323445  | -0.52674367 |
| C | -0.20882654 | 6.86697389  | 0.26227668  |
| H | 3.47442632  | 7.48568185  | 0.06069500  |
| H | -0.42849202 | 8.48005613  | -1.08632680 |
| H | -1.26118802 | 6.67216485  | 0.34150515  |
| N | 0.73058042  | 6.07823661  | 1.00953302  |
| N | 2.49033746  | 7.32528564  | 0.13217930  |
| C | 2.04046032  | 6.35221237  | 0.95579905  |
| O | 2.84035652  | 5.73312603  | 1.67554063  |
| C | 1.64819148  | 8.08210513  | -0.60933950 |
| O | 2.11181825  | 8.97911874  | -1.35693170 |
| C | 0.23974550  | 5.00925828  | 1.84013757  |
| O | -1.18278366 | 4.83196900  | 1.47615464  |
| C | 0.90543834  | 3.63605816  | 1.55596986  |
| H | 0.42108411  | 5.25706768  | 2.87543437  |
| C | -1.40702571 | 3.45870209  | 1.18047420  |
| C | -0.05005965 | 2.99690670  | 0.59214102  |
| H | 0.88265754  | 3.02682264  | 2.43432601  |
| H | 1.93585997  | 3.69206901  | 1.22129238  |
| H | -1.61713421 | 2.86030270  | 2.04846107  |
| H | 0.07874087  | 3.35263017  | -0.41586870 |
| O | 0.25040407  | 1.58021072  | 0.66075194  |
| P | -0.02155229 | 0.32552996  | -0.49482470 |
| O | -0.36995802 | 0.98165940  | -1.87409141 |
| O | -1.12347125 | -0.84927886 | -0.00197007 |
| O | 1.31965595  | -0.71592319 | -0.54279389 |
| H | -1.98477791 | -0.54721792 | -0.04575378 |
| C | -2.56557059 | 3.37959315  | 0.17518892  |
| H | -2.34500111 | 3.97456077  | -0.70239529 |
| H | -3.47907682 | 3.74370381  | 0.58792348  |
| O | -2.65047214 | 2.03109072  | -0.10117228 |

|   |             |             |             |
|---|-------------|-------------|-------------|
| P | -3.59866529 | 1.33431365  | -1.31221400 |
| O | -5.04387109 | 1.89101989  | -1.40446275 |
| O | -2.85120050 | 1.53282400  | -2.85926340 |
| O | -3.61353985 | -0.29816168 | -0.72665987 |
| H | -4.28161475 | -0.79932019 | -1.17022474 |
| H | -1.94819366 | 1.25643256  | -2.76020846 |
| P | 2.98304790  | -0.62622182 | -0.84902134 |
| O | 3.34052924  | -0.08330636 | -2.24918831 |
| O | 3.29544175  | -2.29152380 | -0.68009822 |
| O | 3.80843636  | 0.33060736  | 0.36324682  |
| H | 2.74484808  | -2.55137751 | 0.09663159  |
| C | 5.18535181  | 0.82039040  | 0.30011491  |
| H | 5.88606162  | 0.15871258  | -0.17711849 |
| H | 5.48210078  | 0.96600899  | 1.30898427  |
| C | 5.15148154  | 2.15858015  | -0.39995560 |
| O | 6.34736494  | 2.86364891  | 0.06482126  |
| C | 5.23105161  | 2.19616081  | -1.95833680 |
| H | 4.21065917  | 2.60908515  | -0.11800972 |
| C | 6.89992129  | 3.64925578  | -0.98145754 |
| H | 4.95777094  | 1.25819320  | -2.44538207 |
| H | 7.93737088  | 3.84449621  | -0.81891319 |
| O | 4.38255881  | 3.20590643  | -2.48432685 |
| P | 2.65027665  | 2.75528548  | -2.65380543 |
| O | 2.15038939  | 2.14764754  | -1.32121748 |
| O | 2.30121053  | 1.61912011  | -3.94015687 |
| O | 1.80328769  | 4.16635460  | -3.06644736 |
| H | 2.66228371  | 0.74350216  | -3.76649837 |
| H | 2.08779666  | 4.38601119  | -3.94888984 |
| C | 6.49897243  | 5.82880207  | -2.13615878 |
| C | 5.46832519  | 5.58099780  | -0.22721094 |
| C | 5.77058030  | 6.90324941  | -1.93923280 |
| H | 5.16849098  | 5.13219856  | 0.68529116  |
| C | 5.75213715  | 7.93944028  | -2.87499461 |

|   |            |            |             |
|---|------------|------------|-------------|
| C | 7.35626868 | 6.74129590 | -4.05826999 |
| N | 6.28809883 | 4.97897525 | -1.11660223 |
| N | 5.10599884 | 6.76243928 | -0.66040692 |
| N | 7.31534090 | 5.70828694 | -3.18335322 |
| N | 6.59708605 | 7.83931406 | -3.90702587 |
| N | 4.93917587 | 9.00866133 | -2.80746401 |
| H | 5.01594180 | 9.72939146 | -3.50817279 |
| H | 4.24999903 | 9.10062546 | -2.07847294 |
| H | 8.01456303 | 6.68753264 | -4.91810148 |
| H | 7.35242228 | 1.93897277 | -2.22244699 |
| O | 6.68720042 | 3.43716459 | -3.31533642 |
| C | 6.64235672 | 2.73897730 | -2.19599574 |
| H | 7.60264585 | 3.59014898 | -3.56060249 |

## Initial coordinates ( $x, y, z$ ) of the *open* conformation

|   |             |             |             |
|---|-------------|-------------|-------------|
| O | 38.08700000 | -5.00200000 | 20.55400000 |
| O | 37.93800000 | -4.11900000 | 22.85000000 |
| P | 39.72200000 | -9.83800000 | 19.90400000 |
| O | 40.66100000 | -9.11700000 | 20.83300000 |
| N | 37.24000000 | -5.70400000 | 16.31500000 |
| C | 37.53400000 | -4.36300000 | 16.14600000 |
| N | 38.28300000 | -3.57000000 | 16.94600000 |
| C | 38.36500000 | -2.31800000 | 16.44400000 |
| N | 37.81800000 | -1.81700000 | 15.31300000 |
| C | 37.07700000 | -2.63900000 | 14.53500000 |
| N | 36.54700000 | -2.14300000 | 13.41700000 |
| C | 36.91000000 | -3.98700000 | 14.95700000 |
| N | 36.22500000 | -5.06000000 | 14.40500000 |
| C | 36.44400000 | -6.04500000 | 15.24500000 |
| C | 37.36300000 | -6.18600000 | 20.81100000 |
| C | 37.49400000 | -7.11500000 | 19.64500000 |

|   |             |             |             |
|---|-------------|-------------|-------------|
| D | 36.82100000 | -6.53900000 | 18.48500000 |
| C | 37.67100000 | -6.64700000 | 17.36200000 |
| C | 39.08000000 | -6.53100000 | 17.94500000 |
| D | 40.08100000 | -7.02200000 | 17.06400000 |
| C | 38.93600000 | -7.38000000 | 19.21000000 |
| D | 39.03200000 | -8.76600000 | 18.89000000 |
| D | 39.87800000 | 1.83500000  | 22.39300000 |
| C | 40.56200000 | 0.78600000  | 23.10700000 |
| C | 39.58000000 | 0.04700000  | 23.98400000 |
| D | 38.86400000 | 1.01100000  | 24.79400000 |
| C | 37.47500000 | 0.91800000  | 24.53500000 |
| C | 37.35000000 | 0.26200000  | 23.17400000 |
| C | 38.50900000 | -0.71100000 | 23.20100000 |
| D | 38.13000000 | -1.87400000 | 23.92500000 |
| P | 40.24900000 | 2.19400000  | 20.84300000 |
| D | 40.66200000 | 3.63800000  | 20.74800000 |
| N | 36.90800000 | 2.27200000  | 24.56000000 |
| C | 37.46500000 | 3.30200000  | 23.80200000 |
| C | 35.76600000 | 2.47900000  | 25.33400000 |
| D | 35.26600000 | 1.61600000  | 26.02900000 |
| N | 35.23300000 | 3.74500000  | 25.24100000 |
| C | 35.70400000 | 4.79700000  | 24.46300000 |
| D | 35.00400000 | 5.79500000  | 24.33800000 |
| C | 36.91300000 | 4.52100000  | 23.72400000 |
| H | 36.81800000 | -1.23600000 | 13.09500000 |
| H | 36.03900000 | -7.02600000 | 15.11000000 |
| H | 37.83800000 | -6.66400000 | 21.64200000 |
| H | 36.33100000 | -5.91000000 | 20.87100000 |
| H | 37.06200000 | -8.03700000 | 19.97400000 |
| H | 37.63900000 | -7.56900000 | 16.82000000 |
| H | 39.40000000 | -5.52600000 | 18.12500000 |
| H | 40.94500000 | -6.91300000 | 17.46800000 |
| H | 39.68200000 | -7.14700000 | 19.94100000 |

|   |             |              |             |
|---|-------------|--------------|-------------|
| H | 41.26100000 | 1.26300000   | 23.76100000 |
| H | 40.90700000 | 0.08800000   | 22.37300000 |
| H | 40.15800000 | -0.65200000  | 24.55100000 |
| H | 36.94200000 | 0.34000000   | 25.26100000 |
| H | 36.43800000 | -0.29800000  | 23.15000000 |
| H | 37.54400000 | 0.99900000   | 22.42400000 |
| H | 38.83000000 | -1.02200000  | 22.22900000 |
| H | 38.36900000 | 3.11200000   | 23.26100000 |
| H | 37.36400000 | 5.28100000   | 23.12100000 |
| O | 38.88100000 | 1.92600000   | 19.85300000 |
| O | 41.53600000 | 1.19700000   | 20.31900000 |
| H | 39.16800000 | 1.68700000   | 18.96800000 |
| H | 42.37300000 | 1.61400000   | 20.53800000 |
| O | 36.25700000 | -2.18900000  | 21.96500000 |
| O | 40.21500000 | -5.44300000  | 22.18400000 |
| H | 41.07700000 | -5.05700000  | 22.00800000 |
| H | 35.87800000 | -2.67800000  | 12.90000000 |
| H | 38.94300000 | -1.62700000  | 17.02100000 |
| O | 40.59400000 | -10.99800000 | 19.00000000 |
| O | 38.50700000 | -10.62200000 | 20.81700000 |
| H | 41.53600000 | -10.85100000 | 19.11400000 |
| H | 38.91700000 | -11.18800000 | 21.47600000 |
| H | 34.41900000 | 3.92800000   | 25.79300000 |
| H | 36.91000000 | -1.86200000  | 21.34100000 |
| O | 36.20000000 | -3.25100000  | 24.16100000 |
| O | 39.52200000 | -3.27900000  | 21.30800000 |
| P | 38.99200000 | -4.35600000  | 21.68700000 |
| P | 37.05100000 | -2.89200000  | 23.30600000 |
